# Supplementary material for: Phytoplankton Diversity of a Natural Karst Lake Combining Morphological and Molecular Approaches
Source: MDPI journal article supplement (doi:10.3390/w15071379), 2023-04-03
Supplement: s1 [file s1]

Supplementary Materials for:

# Phytoplankton Diversity of a Natural Karst Lake Combining Morphological and Molecular Approaches

Maja Šimunović, Antonija Kulaš, Petar Žutinić and Marija Gligora Udovič

**Table S1.** Physical and chemical parameters in the euphotic and aphotic zone samples on the sampling stations (V1 to V10, excluding station V8). O<sub>2</sub> – oxygen concentration, O<sub>2</sub> (%) – oxygen saturation, EC – electrical conductivity, T – temperature.

a) euphotic zone samples

| Station | T(°C) | O <sub>2</sub> (mg L <sup>-1</sup> ) | O <sub>2</sub> (%) | pH   | EC (μS cm <sup>-1</sup> ) |
|---------|-------|--------------------------------------|--------------------|------|---------------------------|
| V1      | 22.7  | 10.99                                | 127.8              | 7.95 | 559                       |
| V2      | 22.4  | 11.55                                | 132.6              | 7.88 | 562                       |
| V3      | 23.1  | 10.42                                | 122.2              | 8.01 | 549                       |
| V4      | 22.6  | 10.14                                | 118.2              | 7.90 | 553                       |
| V5      | 22.9  | 11.12                                | 80.1               | 8.20 | 549                       |
| V6      | 23.4  | 10.98                                | 129.9              | 7.93 | 553                       |
| V7      | 22.9  | 12.28                                | 147.5              | 7.95 | 534                       |
| V9      | 26.0  | 10.61                                | 131.6              | 7.95 | 502                       |
| V10     | 26.4  | 10.13                                | 125.7              | 7.94 | 495                       |

b) aphotic zone samples

| Station | T(°C) | O <sub>2</sub> (mg L <sup>-1</sup> ) | O <sub>2</sub> (%) | pH   | EC (μS cm <sup>-1</sup> ) |
|---------|-------|--------------------------------------|--------------------|------|---------------------------|
| V1      | 20.8  | 9.60                                 | 108.2              | 7.71 | 587                       |
| V2      | 18.4  | 5.89                                 | 62.7               | 7.62 | 579                       |
| V3      | 19.4  | 4.62                                 | 50.4               | 7.65 | 559                       |
| V4      | 18.3  | 5.38                                 | 57.1               | 7.05 | 553                       |
| V5      | 17.2  | 4.32                                 | 46.4               | 7.80 | 559                       |
| V6      | 19.2  | 6.18                                 | 67.5               | 7.54 | 568                       |
| V7      | 16.5  | 5.02                                 | 52.3               | 7.39 | 542                       |
| V9      | 20.3  | 2.91                                 | 27.4               | 7.43 | 517                       |

**Table S2.** Chemical parameters measured in the laboratory for composite samples, sampling stations (V1 to V10, excluding station V8). NO<sub>3</sub><sup>-</sup> – nitrate, NO<sub>2</sub><sup>-</sup> – nitrite, NH<sub>4</sub><sup>+</sup> – ammonium, PO<sub>4</sub><sup>3-</sup>-P – ortophosphate, SiO<sub>2</sub> – total silica, TN – total nitrogen, TIC – total inorganic carbon, DIC – dissolved inorganic carbon, TOC – total organic carbon, DOC – dissolved organic carbon, HCO<sub>3</sub><sup>-</sup> – bicarbonates.

| Station/<br>mg L <sup>-1</sup> | NO <sub>3</sub> <sup>-</sup> | NO <sub>2</sub> <sup>-</sup> | NH <sub>4</sub> <sup>+</sup> | PO <sub>4</sub> <sup>3-</sup> -P | SiO <sub>2</sub> | TN  | TIC   | DIC   | TOC  | DOC  | HCO <sub>3</sub> <sup>-</sup> |
|--------------------------------|------------------------------|------------------------------|------------------------------|----------------------------------|------------------|-----|-------|-------|------|------|-------------------------------|
| V1                             | < 0.1                        | < 0.001                      | < 0.01                       | < 0.01                           | 4.0              | < 1 | 11.84 | 11.38 | 2.25 | 2.37 | 163                           |
| V2                             | < 0.1                        | < 0.001                      | < 0.01                       | < 0.01                           | 2.8              | < 1 | 11.82 | 11.68 | 1.65 | 0.80 | 171                           |
| V3                             | < 0.1                        | < 0.001                      | < 0.01                       | < 0.01                           | 2.6              | < 1 | 11.48 | 10.32 | 1.55 | 1.11 | 173                           |
| V4                             | 0.7                          | < 0.001                      | < 0.01                       | 0.02                             | 3.3              | 1   | 13.65 | 12.12 | 1.57 | 1.09 | 151                           |
| V5                             | 0.3                          | < 0.001                      | < 0.01                       | < 0.01                           | 2.5              | 1   | 12.52 | 11.38 | 1.67 | 1.17 | 164                           |
| V6                             | < 0.1                        | < 0.001                      | < 0.01                       | 0.02                             | 4.5              | < 1 | 12.21 | 11.85 | 1.94 | 1.47 | 189                           |
| V7                             | < 0.1                        | < 0.001                      | < 0.01                       | < 0.01                           | 3.5              | < 1 | 13.98 | 13.83 | 2.39 | 1.50 | 212                           |
| V9                             | < 0.1                        | < 0.001                      | < 0.01                       | 0.06                             | 1.5              | < 1 | 12.29 | 11.25 | 1.76 | 1.33 | 163                           |
| V10                            | < 0.1                        | < 0.001                      | < 0.01                       | < 0.01                           | 3.0              | < 1 | 12.15 | 11.08 | 1.74 | 1.18 | 161                           |

**Table S3.** Relative variance explained and factor coordinates of the variables for the first two principal components (PC1 and PC2) of the Principal Component Analysis (PCA). O<sub>2</sub> – oxygen concentration, O<sub>2</sub> (%) – oxygen saturation, T – temperature, SD – Secchi depth, EC – electrical conductivity, NO<sub>3</sub><sup>-</sup> – nitrate, PO<sub>4</sub><sup>3-</sup>-P – ortophosphate, SiO<sub>2</sub> – total silica, TIC – total inorganic carbon, DIC – dissolved inorganic carbon, TOC – total organic carbon, DOC – dissolved organic carbon, HCO<sub>3</sub><sup>-</sup> – bicarbonates.

| Variable                         | PC1    | PC2    |
|----------------------------------|--------|--------|
| Variation (%)                    | 31.5   | 27.5   |
| Cumulative variation (%)         | 31.5   | 59     |
| Eigenvalues                      | 4.41   | 3.84   |
| O <sub>2</sub>                   | 0.015  | -0.464 |
| O <sub>2</sub> (%)               | 0.176  | -0.44  |
| T                                | 0.433  | -0.099 |
| SD                               | 0.193  | 0.202  |
| pH                               | 0.292  | -0.234 |
| EC                               | -0.338 | 0.091  |
| NO <sub>3</sub> <sup>-</sup>     | -0.108 | 0.369  |
| PO <sub>4</sub> <sup>3-</sup> -P | 0.203  | 0.142  |
| SiO <sub>2</sub>                 | -0.318 | -0.136 |
| TIC                              | -0.3   | 0.147  |
| DIC                              | -0.361 | -0.069 |
| TOC                              | -0.241 | -0.368 |
| DOC                              | -0.08  | -0.325 |
| HCO <sub>3</sub> <sup>-</sup>    | -0.325 | -0.185 |

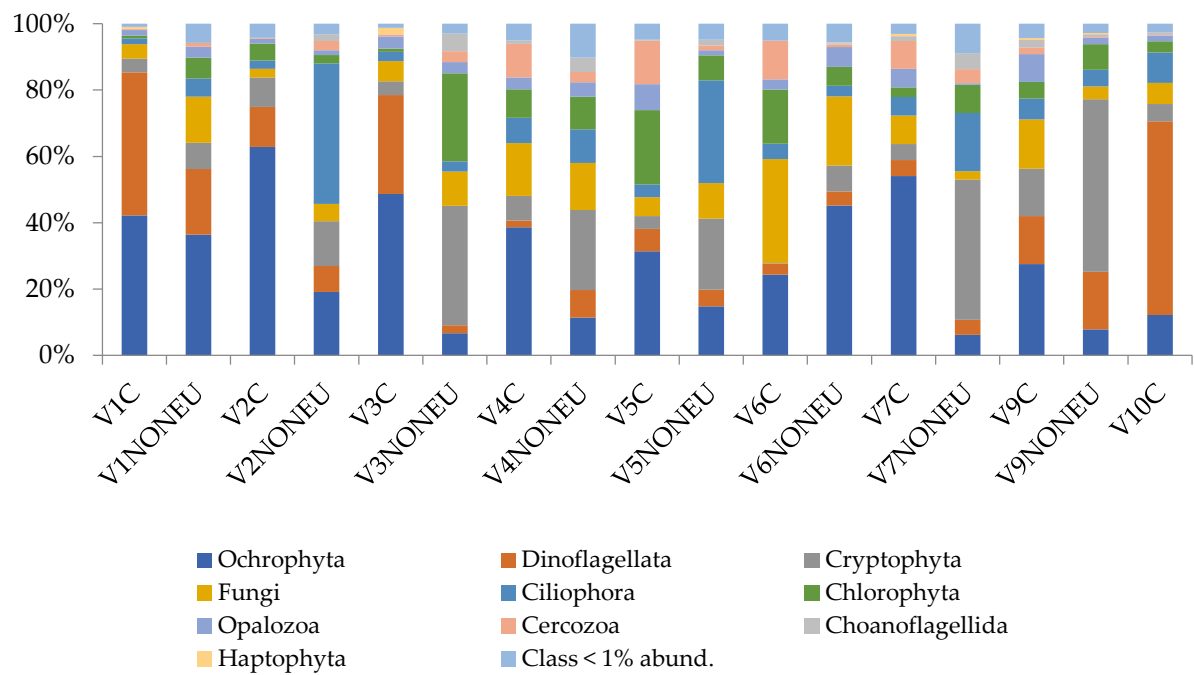

**Figure S1.** Shares of all Eukaryota class groups on the sampling stations (V1 to V10, excluding station V8) in Lake Visovac during August 2018 according to analysis of V9-region of the SSU rRNA gene.

a) composite samples

[illegible]

| Taxa/Station                                                                            | V1      | V2      | V3      | V4      | V5      | V6      | V7      | V9      | V10     |
|-----------------------------------------------------------------------------------------|---------|---------|---------|---------|---------|---------|---------|---------|---------|
| <i>Dictyosphaerium subsolitarium</i> Van Goor                                           | 0       | 0       | 0       | 0       | 0.002   | 0       | 0       | 0       | 0       |
| <i>Golenkinia radiata</i> Chodat                                                        | 0       | 0       | 0       | 0.01    | 0       | 0.02    | 0       | 0       | 0       |
| <i>Monoraphidium arcuatum</i> (Korshikov) Hindák                                        | 0       | 0       | 0       | 0       | 0       | 0       | 0       | < 0.001 | 0       |
| <i>Monoraphidium dybowskii</i> (Woloszynska) Hindák & Komárková Legnerová               | 0.002   | 0.001   | 0.01    | < 0.001 | 0.004   | 0.001   | 0.001   | 0.001   | 0.002   |
| <i>Monoraphidium minutum</i> (Nägeli) Komárková-legnerová                               | < 0.001 | < 0.001 | 0.001   | < 0.001 | 0.001   | < 0.001 | < 0.001 | < 0.001 | 0       |
| <i>Oocystis parva</i> West & G.S.West                                                   | 0.001   | 0.001   | 0       | 0.001   | 0.003   | 0.001   | 0       | < 0.001 | < 0.001 |
| <i>Planktosphaeria gelatinosa</i> G.M.Smith                                             | 0       | 0       | 0       | 0.001   | 0.002   | 0       | 0       | 0.001   | 0.001   |
| <i>Radiococcus planktonicus</i> J.W.G.Lund                                              | 0       | 0       | 0.005   | 0       | 0       | 0       | 0       | 0.001   | 0.004   |
| <i>Scenedesmus obtusus</i> Meyen                                                        | 0       | 0       | 0       | 0       | 0       | 0       | 0       | 0       | 0.001   |
| <i>Scenedesmus planctonicus</i> (Korshikov) Fott                                        | 0       | 0       | 0       | 0.003   | 0       | 0       | 0       | 0       | 0.001   |
| <i>Scenedesmus quadricauda</i> (Turpin) Brébisson                                       | 0       | 0       | 0       | 0       | 0       | 0       | 0       | 0       | 0.004   |
| <i>Sphaerocystis Schroeteri</i> Chodat                                                  | 0       | 0       | 0       | 0       | 0       | 0       | 0       | 0       | 0.001   |
| <i>Tetraëdron minimum</i> (A.Braun) Hansgirg                                            | 0       | 0       | 0       | 0       | 0       | 0       | 0       | 0.001   | 0.002   |
| <i>Tetraselmis cordiformis</i> (N.Carter) Stein                                         | 0.35    | 0.23    | 0.08    | 0.04    | 0.23    | 0.02    | 0.01    | 0.02    | 0.01    |
| <i>Tetrastrum triangulare</i> (Chodat) Komárek                                          | 0       | 0       | 0       | 0       | 0       | 0       | 0       | < 0.001 | < 0.001 |
| <i>Ceratium hirundinella</i> (O.F.Müller) Dujardin                                      | 0.91    | 0.41    | 0.05    | 0.36    | 0.01    | 0.18    | 0.01    | 0.36    | 0.001   |
| <i>Parvodinium inconspicuum</i> (Lemmermann) Carty                                      | 0.06    | 0.01    | 0.20    | 0.01    | 0.05    | 0.01    | 0.03    | 0.04    | 0.04    |
| <i>Cosmarium</i> sp.                                                                    | 0       | 0       | 0.01    | 0       | 0       | 0       | 0       | 0       | 0       |
| <i>Elakatothrix gelatinosa</i> Wille                                                    | < 0.001 | < 0.001 | 0.002   | < 0.001 | 0.001   | < 0.001 | 0.002   | 0.001   | < 0.001 |
| <i>Gonatozygon</i> sp.                                                                  | 0       | 0       | 0       | 0       | 0       | 0       | 0       | 0       | 0       |
| <i>Staurostrum tetracerum</i> Ralfs ex Ralfs                                            | 0       | 0       | 0       | 0       | 0       | 0       | 0       | 0       | 0       |
| <i>Anabaena</i> sp.                                                                     | 0       | 0       | 0       | 0       | 0       | 0       | 0       | 0       | < 0.001 |
| <i>Anathece smithii</i> (Komárková-Legnerová & Cronberg) Komárek, Kastovsky & Jezberová | < 0.001 | < 0.001 | < 0.001 | < 0.001 | < 0.001 | < 0.001 | < 0.001 | < 0.001 | < 0.001 |
| <i>Merismopedia tenuissima</i> Lemmermann                                               | 0       | 0       | 0       | 0       | 0       | 0       | 0       | 0       | 0       |
| <i>Pseudanabaena</i> sp.                                                                | 0       | < 0.001 | 0       | 0       | 0       | 0       | 0       | 0       | < 0.001 |

b) euphotic zone samples

| Taxa/Station                                                                 | V1      | V2      | V3      | V4      | V5    | V6    | V7      | V9      | V10     |
|------------------------------------------------------------------------------|---------|---------|---------|---------|-------|-------|---------|---------|---------|
| <i>Aulacoseira granulata</i> (Ehrenberg) Simonsen                            | 0       | 0       | 0       | 0       | 0     | 0     | 0       | 0       | < 0.001 |
| <i>Cocconeis placentula</i> Ehrenberg                                        | 0       | 0       | 0       | 0       | 0     | 0     | 0       | 0       | 0       |
| <i>Diatoma vulgaris</i> Bory                                                 | 0       | 0       | 0       | 0       | 0     | 0     | 0       | 0       | 0       |
| <i>Gomphonema</i> sp.                                                        | 0       | 0       | 0       | 0.001   | 0     | 0     | 0       | 0       | 0       |
| <i>Navicula lanceolata</i> Ehrenberg                                         | 0       | 0       | 0       | 0       | 0     | 0     | 0       | 0       | 0.004   |
| <i>Pantocsekiella ocellata</i> (Pantocsek) K.T.Kiss & E.Ács                  | 0.05    | 0.09    | 0.46    | 0.37    | 0.63  | 0.61  | 0.26    | 0.06    | 0.04    |
| <i>Skeletonema potamos</i> (C.I.Weber) Hasle                                 | 0.005   | 0.01    | 0.01    | 0.004   | 0.01  | 0.02  | 0.05    | 0.01    | 0.01    |
| <i>Ulnaria acus</i> (Kützing) Aboal                                          | 0       | 0       | 0       | 0       | 0.002 | 0     | 0       | 0       | 0       |
| <i>Bitrichia chodatii</i> (Reverdin) Chodat                                  | 0.001   | 0.003   | 0.02    | 0.01    | 0.03  | 0.03  | 0.003   | 0.002   | 0       |
| <i>Chromulina pigra</i> Skuja                                                | 0.001   | 0       | 0.002   | 0.003   | 0.002 | 0.003 | < 0.001 | < 0.001 | 0.001   |
| <i>Dinobryon bavaricum</i> Imhof                                             | 0       | < 0.001 | 0.003   | 0.001   | 0.003 | 0.04  | 0.001   | 0.001   | 0.001   |
| <i>Dinobryon crenulatum</i> West & G.S.West                                  | 0       | < 0.001 | 0.01    | 0.001   | 0.003 | 0.003 | 0.001   | < 0.001 | 0       |
| <i>Dinobryon divergens</i> O.E.Imhof                                         | 0.01    | 0.02    | 0.04    | 0.03    | 0.10  | 0.10  | 0.03    | 0.05    | 0.04    |
| <i>Ochromonas danica</i> E.G.Pringsheim                                      | 0       | 0       | 0.01    | < 0.001 | 0.02  | 0     | 0       | 0       | 0       |
| <i>Synura</i> sp.                                                            | 0       | 0       | 0       | 0       | 0     | 0     | 0       | 0       | 0       |
| <i>Cryptomonas</i> sp.                                                       | 0.06    | 0.13    | 0.25    | 0.21    | 0.44  | 0.45  | 0.12    | 0.10    | 0.11    |
| <i>Plagioselmis nannoplanctica</i> (Skuja) G.Novarino, I.A.N.Lucas & Morrall | 0.01    | 0.03    | 0.06    | 0.07    | 0.16  | 0.23  | 0.05    | 0.04    | 0.05    |
| <i>Phacus</i> sp.                                                            | 0       | 0       | 0       | 0       | 0     | 0     | 0       | 0.001   | 0       |
| <i>Actinastrum hantzschii</i> Lagerheim                                      | 0       | 0       | 0       | 0       | 0     | 0     | 0       | 0       | 0       |
| <i>Ankyra lanceolata</i> (Korshikov) Fott                                    | < 0.001 | < 0.001 | < 0.001 | 0.001   | 0.005 | 0.003 | 0       | 0       | < 0.001 |
| <i>Ankistrodesmus spiralis</i> (W.B.Turner) Lemmermann                       | 0       | 0       | 0       | < 0.001 | 0     | 0     | 0       | 0       | < 0.001 |
| <i>Chlamydomonas</i> sp.                                                     | 0.09    | 0.06    | 0.02    | 0.06    | 0.09  | 0.04  | 0.05    | 0.01    | 0.03    |
| <i>Coelastrum astroideum</i> De Notaris                                      | 0       | 0       | 0       | 0       | 0     | 0     | 0       | 0       | 0.002   |
| <i>Coelastrum microporum</i> Nägeli                                          | 0       | 0.001   | 0       | 0       | 0     | 0     | 0.001   | 0       | 0       |
| <i>Crucigenia fenestrata</i> (Schmidle) Schmidle                             | 0       | 0       | 0       | 0.001   | 0     | 0     | 0       | 0       | 0       |
| <i>Dictyosphaerium</i> sp.                                                   | 0       | 0       | 0       | 0       | 0     | 0     | < 0.001 | < 0.001 | 0       |
| <i>Dictyosphaerium subsolitarium</i> Van Goor                                | 0       | 0       | 0       | 0       | 0.001 | 0     | 0       | < 0.001 | 0       |
| <i>Golenkinia radiata</i> Chodat                                             | 0       | 0       | 0       | 0       | 0     | 0     | 0       | 0       | 0       |
| <i>Monoraphidium arcuatum</i> (Korshikov) Hindák                             | 0       | 0       | 0       | < 0.001 | 0     | 0     | 0       | < 0.001 | 0       |

| Taxa/Station                                                                            | V1      | V2      | V3      | V4      | V5      | V6      | V7      | V9      | V10     |
|-----------------------------------------------------------------------------------------|---------|---------|---------|---------|---------|---------|---------|---------|---------|
| <i>Monoraphidium dybowskii</i> (Woloszynska) Hindák & Komárková Legnerová               | < 0.001 | 0.002   | 0.01    | 0.002   | 0.01    | 0.01    | 0.001   | 0.001   | 0.002   |
| <i>Monoraphidium minutum</i> (Nägeli) Komárková-legnerová                               | < 0.001 | < 0.001 | 0.0003  | < 0.001 | 0.002   | 0.002   | < 0.001 | < 0.001 | < 0.001 |
| <i>Oocystis parva</i> West & G.S.West                                                   | 0.001   | < 0.001 | 0       | 0.001   | 0.001   | 0.001   | < 0.001 | 0.001   | 0.001   |
| <i>Planktosphaeria gelatinosa</i> G.M.Smith                                             | 0       | 0       | 0       | < 0.001 | 0.002   | 0.002   | 0.003   | 0.01    | < 0.001 |
| <i>Radiococcus planktonicus</i> J.W.G.Lund                                              | < 0.001 | 0       | 0       | 0       | 0       | 0       | < 0.001 | < 0.001 | 0.002   |
| <i>Scenedesmus obtusus</i> Meyen                                                        | 0       | 0       | 0       | 0       | 0       | 0       | 0       | < 0.001 | < 0.001 |
| <i>Scenedesmus planctonicus</i> (Korshikov) Fott                                        | 0       | 0       | 0       | 0       | 0       | 0       | 0       | < 0.001 | < 0.001 |
| <i>Scenedesmus quadricauda</i> (Turpin) Brébisson                                       | 0       | 0       | 0       | 0       | 0       | 0       | 0       | 0.001   | 0.01    |
| <i>Sphaerocystis Schroeteri</i> Chodat                                                  | 0       | 0       | 0       | 0       | 0       | 0       | 0       | 0.01    | 0.003   |
| <i>Tetraëdron minimum</i> (A.Braun) Hansgirg                                            | 0       | 0       | 0       | 0       | 0       | 0       | 0       | 0.002   | 0.002   |
| <i>Tetraselmis cordiformis</i> (N.Carter) Stein                                         | 0.04    | 0.27    | 0.31    | 0.28    | 0.36    | 0.28    | 0.02    | 0.02    | 0       |
| <i>Tetrastrum triangulare</i> (Chodat) Komárek                                          | 0       | < 0.001 | < 0.001 | 0       | < 0.001 | < 0.001 | < 0.001 | < 0.001 | 0.001   |
| <i>Ceratium hirundinella</i> (O.F.Müller) Dujardin                                      | 0.18    | 0.59    | 0.52    | 0.15    | 0.27    | 1.29    | 0.52    | 0.17    | 0.08    |
| <i>Parvodinium inconspicuum</i> (Lemmermann) Carty                                      | 0.02    | 0.02    | 0.06    | 0.03    | 0.09    | 0.09    | 0.07    | 0.13    | 0.11    |
| <i>Cosmarium</i> sp.                                                                    | 0       | 0       | 0       | 0       | 0       | 0       | 0       | 0       | 0.004   |
| <i>Elakatothrix gelatinosa</i> Wille                                                    | 0.001   | 0.001   | 0.001   | 0.002   | 0.001   | 0.005   | 0.001   | 0.001   | 0.002   |
| <i>Gonatozygon</i> sp.                                                                  | 0       | 0       | 0       | 0       | 0       | 0       | 0       | 0       | 0.001   |
| <i>Staurastrum tetracerum</i> Ralfs ex Ralfs                                            | 0       | 0       | 0       | 0       | 0       | 0       | 0       | 0       | 0.02    |
| <i>Anabaena</i> sp.                                                                     | 0       | 0       | 0       | 0       | 0       | 0       | 0       | 0       | 0.001   |
| <i>Anathece smithii</i> (Komárková-Legnerová & Cronberg) Komárek, Kastovsky & Jezberová | < 0.001 | < 0.001 | < 0.001 | < 0.001 | < 0.001 | < 0.001 | < 0.001 | < 0.001 | < 0.001 |
| <i>Merismopedia tenuissima</i> Lemmermann                                               | 0       | 0       | 0       | 0       | 0       | 0       | 0       | 0       | 0       |
| <i>Pseudanabaena</i> sp.                                                                | < 0.001 | 0       | 0       | 0       | 0       | 0       | 0       | 0       | 0.001   |

c) aphotic zone samples

| Taxa/Station                                      | V1 | V2 | V3 | V4    | V5 | V6 | V7 | V9 |
|---------------------------------------------------|----|----|----|-------|----|----|----|----|
| <i>Aulacoseira granulata</i> (Ehrenberg) Simonsen | 0  | 0  | 0  | 0     | 0  | 0  | 0  | 0  |
| <i>Cocconeis placentula</i> Ehrenberg             | 0  | 0  | 0  | 0.001 | 0  | 0  | 0  | 0  |



[illegible]

| Taxa/Station                                                                            | V1      | V2      | V3      | V4      | V5      | V6      | V7      | V9      |
|-----------------------------------------------------------------------------------------|---------|---------|---------|---------|---------|---------|---------|---------|
| <i>Oocystis parva</i> West & G.S.West                                                   | < 0.001 | < 0.001 | < 0.001 | 0       | 0.001   | < 0.001 | < 0.001 | < 0.001 |
| <i>Planktosphaeria gelatinosa</i> G.M.Smith                                             | 0       | 0       | < 0.001 | < 0.001 | < 0.001 | < 0.001 | < 0.001 | < 0.001 |
| <i>Radiococcus planktonicus</i> J.W.G.Lund                                              | 0       | 0       | 0       | 0       | 0       | 0       | < 0.001 | < 0.001 |
| <i>Scenedesmus obtusus</i> Meyen                                                        | 0       | 0       | 0       | 0       | 0       | 0       | 0       | < 0.001 |
| <i>Scenedesmus planctonicus</i> (Korshikov) Fott                                        | 0       | 0       | 0       | 0       | 0       | 0       | 0       | 0       |
| <i>Scenedesmus quadricauda</i> (Turpin) Brébisson                                       | 0       | 0       | 0       | 0       | 0       | 0       | 0       | 0       |
| <i>Sphaerocystis Schroeteri</i> Chodat                                                  | 0       | 0       | 0       | 0       | 0       | 0       | 0       | 0       |
| <i>Tetraëdron minimum</i> (A.Braun) Hansgirg                                            | 0       | 0       | 0       | 0       | 0       | 0       | 0       | < 0.001 |
| <i>Tetraselmis cordiformis</i> (N.Carter) Stein                                         | 0.04    | 0.06    | 0.05    | 0.03    | 0.08    | 0.16    | 0.01    | 0.02    |
| <i>Tetrastrum triangulare</i> (Chodat) Komárek                                          | 0       | < 0.001 | < 0.001 | 0       | < 0.001 | < 0.001 | < 0.001 | < 0.001 |
| <i>Ceratium hirundinella</i> (O.F.Müller) Dujardin                                      | 0.18    | 0.05    | 0.06    | 0.18    | 0.21    | 0.27    | 0.11    | 0.001   |
| <i>Parvodinium inconspicuum</i> (Lemmermann) Carty                                      | 0.02    | 0.004   | 0.005   | 0.01    | 0.01    | 0.04    | 0.004   | 0.002   |
| <i>Cosmarium</i> sp.                                                                    | 0       | 0       | 0.004   | 0       | 0       | 0       | 0       | 0       |
| <i>Elakatothrix gelatinosa</i> Wille                                                    | < 0.001 | 0       | < 0.001 | 0       | < 0.001 | 0.002   | < 0.001 | 0       |
| <i>Gonatozygon</i> sp.                                                                  | 0       | 0       | 0       | 0       | 0       | 0       | 0       | 0       |
| <i>Staurostrum tetracerum</i> Ralfs ex Ralfs                                            | 0       | 0       | 0       | 0       | 0       | 0       | 0       | 0       |
| <i>Anabaena</i> sp.                                                                     | 0       | 0       | 0       | 0       | 0       | 0       | 0       | 0       |
| <i>Anathece smithii</i> (Komárková-Legnerová & Cronberg) Komárek, Kastovsky & Jezberová | < 0.001 | < 0.001 | < 0.001 | < 0.001 | < 0.001 | < 0.001 | < 0.001 | < 0.001 |
| <i>Merismopedia tenuissima</i> Lemmermann                                               | 0       | 0       | 0       | 0       | 0       | 0       | < 0.001 | 0       |
| <i>Pseudanabaena</i> sp.                                                                | 0       | 0       | 0       | 0       | 0       | 0       | < 0.001 | < 0.001 |

**Table S5.** Assigned taxonomic amplicon sequencing variants for phytoplankton community on the sampling stations (V1 to V10, excluding station V8) in Lake Visovac during August 2018. C - composite samples, NONEU - aphotic zone samples.

| Amplicon sequencing variants (ASVs)                                                                                            | V1<br>C   | V1<br>NO<br>NE<br>U | V2<br>C   | V2<br>NO<br>NE<br>U | V3<br>C    | V3<br>NO<br>NE<br>U | V4<br>C | V4<br>NO<br>NE<br>U | V5<br>C | V5<br>NO<br>NE<br>U | V6<br>C | V6<br>NO<br>NE<br>U | V7<br>C | V7<br>NO<br>NE<br>U | V9<br>C | V9<br>NO<br>NE<br>U | V10<br>C |
|--------------------------------------------------------------------------------------------------------------------------------|-----------|---------------------|-----------|---------------------|------------|---------------------|---------|---------------------|---------|---------------------|---------|---------------------|---------|---------------------|---------|---------------------|----------|
| Eukaryota;Alveolata;Dinoflagellata;Dinophyceae;Gymnodiniales;Gymnodiniaceae;__;__;__                                           | 0         | 0                   | 0         | 0                   | 0          | 0                   | 0       | 0                   | 0       | 0                   | 0       | 0                   | 0       | 0                   | 0       | 0                   | 4        |
| Eukaryota;Alveolata;Dinoflagellata;Dinophyceae;Gymnodiniales;Gymnodiniaceae;X;Levanderina;Levanderina_fissa;                   | 0         | 0                   | 0         | 0                   | 0          | 0                   | 0       | 0                   | 0       | 0                   | 0       | 0                   | 0       | 0                   | 0       | 0                   | 0        |
| Eukaryota;Alveolata;Dinoflagellata;Dinophyceae;Peridinales;Kryptoperidiniaceae;Durinskia;Durinskia_dybowskii;                  | 0         | 0                   | 0         | 0                   | 0          | 0                   | 0       | 0                   | 0       | 0                   | 0       | 0                   | 0       | 0                   | 0       | 0                   | 0        |
| Eukaryota;Alveolata;Dinoflagellata;Dinophyceae;Peridinales;Peridiniaceae;Peridinium;Peridinium_bipes;                          | 0         | 0                   | 0         | 0                   | 0          | 10                  | 0       | 0                   | 0       | 0                   | 0       | 0                   | 0       | 0                   | 0       | 0                   | 15.95    |
| Eukaryota;Alveolata;Dinoflagellata;Dinophyceae;Peridinales;Peridiniaceae;Peridinium;Peridinium_willei;                         | 0         | 20                  | 18        | 0                   | 7          | 0                   | 0       | 0                   | 0       | 0                   | 0       | 0                   | 0       | 0                   | 0       | 0                   | 4        |
| Eukaryota;Alveolata;Dinoflagellata;Dinophyceae;Peridinales;Peridiniaceae;Peridinium;__;__                                      | 0         | 0                   | 0         | 0                   | 0          | 0                   | 0       | 0                   | 0       | 0                   | 0       | 0                   | 21      | 0                   | 2.2     | 1.1                 | 161      |
| Eukaryota;Alveolata;Dinoflagellata;Dinophyceae;Peridinales;Peridiniopsidaceae;Parvodinium;Parvodinium_inconspicuum;            | 53        | 24                  | 12        | 0                   | 167        | 0                   | 0       | 0                   | 0       | 0                   | 0       | 182                 | 0       | 0                   | 33      | 13                  | 23       |
| Eukaryota;Alveolata;Dinoflagellata;Dinophyceae;Peridinales;Thoracosphaeraceae;Theleodinium;Theleodinium_calcisporum;           | 0         | 0                   | 0         | 0                   | 0          | 0                   | 0       | 0                   | 0       | 0                   | 0       | 0                   | 66      | 0                   | 0       | 0                   | 0        |
| Eukaryota;Alveolata;Dinoflagellata;Dinophyceae;Peridinales;Thoracosphaeraceae;__;__;__                                         | 0         | 0                   | 0         | 0                   | 0          | 0                   | 0       | 0                   | 0       | 15                  | 0       | 0                   | 0       | 0                   | 0       | 0                   | 23       |
| Eukaryota;Alveolata;Dinoflagellata;Dinophyceae;Peridinales;__;__;__;__                                                         | 0         | 0                   | 0         | 0                   | 0          | 0                   | 0       | 137                 | 0       | 0                   | 0       | 0                   | 0       | 0                   | 0       | 99                  | 63       |
| Eukaryota;Alveolata;Dinoflagellata;Dinophyceae;Suessiales;Suessiaceae;Biecheleria;Biecheleria_brevisulcata;                    | 1.2<br>04 | 552                 | 278       | 64                  | 1.2<br>43  | 28                  | 455     | 286                 | 246     | 26                  | 51      | 138                 | 334     | 0                   | 366     | 146                 | 524      |
| Eukaryota;Alveolata;Dinoflagellata;Dinophyceae;__;__;__;__                                                                     | 5.5<br>63 | 1.5<br>07           | 1.0<br>26 | 86                  | 11.<br>660 | 65                  | 280     | 163                 | 200     | 239                 | 13      | 205                 | 915     | 72                  | 517     | 167                 | 585      |
| Eukaryota;Alveolata;Dinoflagellata;Oxyrrhea;Oxyrrhinales;Oxyrrhinaceae;Oxyrrhis;Oxyrrhis_sp.;                                  | 0         | 0                   | 0         | 0                   | 0          | 0                   | 0       | 0                   | 0       | 0                   | 0       | 0                   | 0       | 0                   | 0       | 0                   | 0        |
| Eukaryota;Alveolata;Dinoflagellata;__;__;__;__;__                                                                              | 21        | 0                   | 0         | 0                   | 0          | 0                   | 0       | 0                   | 0       | 0                   | 0       | 0                   | 0       | 0                   | 0       | 0                   | 23       |
| Eukaryota;Alveolata;Perkinsea;Perkinsida;Perkinsida_X;Parvilucifera-group;Parvilucifera-group_X;Parvilucifera-group_X_sp.;     | 0         | 0                   | 0         | 0                   | 0          | 62                  | 0       | 0                   | 0       | 70                  | 0       | 0                   | 0       | 0                   | 0       | 0                   | 0        |
| Eukaryota;Alveolata;Perkinsea;Perkinsida;Perkinsida_X;Perkinsida_XX;Perkinsida_XXX;Perkinsida_XXX_sp.;                         | 0         | 0                   | 0         | 0                   | 0          | 0                   | 0       | 0                   | 0       | 0                   | 0       | 0                   | 10      | 0                   | 0       | 0                   | 0        |
| Eukaryota;Archaeplastida;Chlorophyta;Chlorodendrophyceae;Chlorodendrales;Chlorodendraceae;Tetraselmis;Tetraselmis_cordiformis; | 21        | 473                 | 418       | 39                  | 71         | 653                 | 249     | 74                  | 293     | 47                  | 95      | 267                 | 153     | 22                  | 11      | 15                  | 45       |
| Eukaryota;Archaeplastida;Chlorophyta;Chlorodendrophyceae;Chlorodendrales;Chlorodendraceae;__;__;__                             | 0         | 30                  | 22        | 0                   | 0          | 0                   | 0       | 0                   | 0       | 0                   | 0       | 28                  | 7       | 0                   | 0       | 0                   | 0        |



| Amplicon sequencing variants (ASVs)                                                                                                            | V1<br>C | V1<br>NO<br>NE<br>U | V2<br>C | V2<br>NO<br>NE<br>U | V3<br>C | V3<br>NO<br>NE<br>U | V4<br>C | V4<br>NO<br>NE<br>U | V5<br>C | V5<br>NO<br>NE<br>U | V6<br>C | V6<br>NO<br>NE<br>U | V7<br>C | V7<br>NO<br>NE<br>U | V9<br>C   | V9<br>NO<br>NE<br>U | V10<br>C |
|------------------------------------------------------------------------------------------------------------------------------------------------|---------|---------------------|---------|---------------------|---------|---------------------|---------|---------------------|---------|---------------------|---------|---------------------|---------|---------------------|-----------|---------------------|----------|
| _;                                                                                                                                             |         |                     |         |                     |         |                     |         |                     |         |                     |         |                     |         |                     |           |                     |          |
| Eukaryota;Excavata;Discoba;Euglenida;Euglenophyceae;_;;_;                                                                                      | 0       | 0                   | 0       | 0                   | 0       | 0                   | 0       | 0                   | 0       | 0                   | 0       | 0                   | 0       | 0                   | 0         | 0                   | 0        |
| Eukaryota;Excavata;Discoba;Euglenida;Petalomonadida;Eupetalomonads_X;Eu<br>petalomonads_XX;Eupetalomonads_XX_sp.;                              | 0       | 0                   | 0       | 0                   | 0       | 0                   | 0       | 0                   | 0       | 0                   | 0       | 3                   | 0       | 0                   | 0         | 0                   | 0        |
| Eukaryota;Excavata;Discoba;Euglenida;Petalomonadida;Scytomonadidae;Petalomonas;Petalomonas_sphagnophila;                                       | 0       | 0                   | 0       | 0                   | 0       | 0                   | 6       | 3                   | 0       | 0                   | 0       | 0                   | 0       | 0                   | 0         | 0                   | 6        |
| Eukaryota;Excavata;Discoba;Euglenida;Petalomonadida;_;;_;                                                                                      | 0       | 0                   | 0       | 0                   | 0       | 0                   | 16      | 0                   | 0       | 0                   | 0       | 0                   | 0       | 0                   | 0         | 0                   | 0        |
| Eukaryota;Excavata;Discoba;Euglenida;_;;_;                                                                                                     | 0       | 0                   | 0       | 0                   | 0       | 0                   | 0       | 0                   | 0       | 0                   | 0       | 0                   | 0       | 0                   | 0         | 3                   | 0        |
| Eukaryota;Hacrobia;Cryptophyta;Cryptophyceae;Cryptomonadales;Cryptomonadales_X;Cryptomonas;Cryptomonas_curvata;                                | 70      | 157                 | 118     | 24                  | 100     | 97                  | 271     | 157                 | 60      | 125                 | 0       | 112                 | 161     | 107                 | 386       | 316                 | 366      |
| Eukaryota;Hacrobia;Cryptophyta;Cryptophyceae;Cryptomonadales;Cryptomonadales_X;Cryptomonas;Cryptomonas_marssonii;                              | 245     | 263                 | 566     | 42                  | 478     | 1.0<br>13           | 499     | 162                 | 58      | 264                 | 0       | 288                 | 255     | 302                 | 1.7<br>84 | 1.8<br>36           | 844      |
| Eukaryota;Hacrobia;Cryptophyta;Cryptophyceae;Cryptomonadales;Cryptomonadales_X;Cryptomonas;Cryptomonas_obovoidea;                              | 0       | 0                   | 0       | 0                   | 0       | 0                   | 0       | 0                   | 0       | 0                   | 0       | 0                   | 0       | 0                   | 58        | 107                 | 57       |
| Eukaryota;Hacrobia;Cryptophyta;Cryptophyceae;Cryptomonadales;Cryptomonadales_X;Cryptomonas;_;                                                  | 0       | 0                   | 0       | 0                   | 0       | 0                   | 0       | 0                   | 0       | 0                   | 0       | 0                   | 73      | 0                   | 114       | 2.2<br>09           | 28       |
| Eukaryota;Hacrobia;Cryptophyta;Cryptophyceae;Cryptomonadales;Cryptomonadales_X;Plagioselmis;Plagioselmis_nannoplanctica;                       | 16      | 51                  | 64      | 0                   | 249     | 0                   | 962     | 726                 | 28      | 325                 | 0       | 89                  | 174     | 0                   | 101       | 18                  | 48       |
| Eukaryota;Hacrobia;Cryptophyta;Cryptophyceae;Cryptomonadales;Cryptomonadales_X;_;;_;                                                           | 251     | 206                 | 199     | 127                 | 313     | 45                  | 483     | 297                 | 37      | 297                 | 0       | 64                  | 8       | 0                   | 97        | 0                   | 54       |
| Eukaryota;Hacrobia;Cryptophyta;Cryptophyceae;Cryptophyceae_X;Basal_Cryptophyceae-1;Basal_Cryptophyceae-1_X;Basal_Cryptophyceae-1_X_sp.;        | 47      | 154                 | 0       | 59                  | 611     | 18                  | 393     | 267                 | 38      | 166                 | 0       | 248                 | 455     | 0                   | 391       | 0                   | 66       |
| Eukaryota;Hacrobia;Cryptophyta;Cryptophyceae;Pyrenomonadales;Pyrenomonadaceae;Rhodomonas;Rhodomonas_sp.;                                       | 22      | 15                  | 23      | 9                   | 77      | 331                 | 152     | 107                 | 27      | 28                  | 5       | 168                 | 201     | 256                 | 89        | 86                  | 0        |
| Eukaryota;Hacrobia;Cryptophyta;Cryptophyceae;_;;_;                                                                                             | 0       | 0                   | 0       | 0                   | 0       | 0                   | 0       | 0                   | 0       | 0                   | 0       | 0                   | 0       | 0                   | 88        | 0                   | 92       |
| Eukaryota;Hacrobia;Haptophyta;Prymnesiophyceae;Prymnesiales;Chrysochromulinaceae;Chrysochromulina;_;                                           | 96      | 0                   | 5       | 0                   | 846     | 0                   | 46      | 0                   | 0       | 0                   | 0       | 19                  | 188     | 0                   | 128       | 34                  | 16       |
| Eukaryota;Hacrobia;Katablepharidophyta;Katablepharidaceae;Katablepharidales;Katablepharidales_X;Katablepharidales_XX;Katablepharidales_XX_sp.; | 79      | 209                 | 236     | 29                  | 107     | 0                   | 917     | 365                 | 171     | 51                  | 87      | 214                 | 167     | 0                   | 197       | 0                   | 44       |
| Eukaryota;Hacrobia;Telonemia;Telonemia_X;Telonemia_XX;Telonemia-Group-1;Telonemia-Group-1_X;Telonemia-Group-1_X_sp.;                           | 0       | 0                   | 0       | 0                   | 0       | 0                   | 0       | 0                   | 0       | 0                   | 0       | 0                   | 4       | 0                   | 0         | 0                   | 0        |
| Eukaryota;Opisthokonta;Choanoflagellida;Choanoflagellata;Craspedida;Monosigidae_Group_M;Salpingoeca_M;Salpingoeca_urceolata;                   | 2       | 0                   | 0       | 0                   | 20      | 0                   | 18      | 12                  | 0       | 0                   | 0       | 17                  | 15      | 6                   | 80        | 7                   | 26       |
| Eukaryota;Opisthokonta;Choanoflagellida;Choanoflagellata;Craspedida;Salpingoecidae_Group_C1;Salpingoeca_C1;Salpingoeca_fusiformis;             | 0       | 0                   | 0       | 40                  | 10      | 209                 | 294     | 299                 | 14      | 95                  | 0       | 26                  | 220     | 69                  | 29        | 34                  | 8        |
| Eukaryota;Opisthokonta;Choanoflagellida;Choanoflagellida_X;Choanoflagellida                                                                    | 0       | 0                   | 0       | 0                   | 0       | 0                   | 0       | 0                   | 0       | 0                   | 0       | 0                   | 147     | 0                   | 0         | 0                   | 0        |



| Amplicon sequencing variants (ASVs)                                                                                                             | V1<br>C | V1<br>NO<br>NE<br>U | V2<br>C | V2<br>NO<br>NE<br>U | V3<br>C   | V3<br>NO<br>NE<br>U | V4<br>C   | V4<br>NO<br>NE<br>U | V5<br>C | V5<br>NO<br>NE<br>U | V6<br>C | V6<br>NO<br>NE<br>U | V7<br>C   | V7<br>NO<br>NE<br>U | V9<br>C   | V9<br>NO<br>NE<br>U | V10<br>C |
|-------------------------------------------------------------------------------------------------------------------------------------------------|---------|---------------------|---------|---------------------|-----------|---------------------|-----------|---------------------|---------|---------------------|---------|---------------------|-----------|---------------------|-----------|---------------------|----------|
| Eukaryota;Stramenopiles;Ochrophyta;Chrysophyceae;Chrysophyceae_X;Chryso<br>phyceae_Clade-E;Chrysophyceae_Clade-E_X;Chrysophyceae_Clade-E_X_sp.; | 0       | 0                   | 0       | 0                   | 9         | 22                  | 0         | 0                   | 0       | 360                 | 0       | 0                   | 0         | 0                   | 0         | 0                   | 0        |
| Eukaryota;Stramenopiles;Ochrophyta;Chrysophyceae;Chrysophyceae_X;Chryso<br>phyceae_Clade-E;__;__                                                | 44      | 23                  | 21      | 0                   | 338       | 0                   | 335       | 0                   | 33      | 0                   | 0       | 89                  | 46        | 0                   | 0         | 0                   | 0        |
| Eukaryota;Stramenopiles;Ochrophyta;Chrysophyceae;Chrysophyceae_X;Chryso<br>phyceae_Clade-F;Paraphysomonas;__;__                                 | 0       | 15                  | 0       | 0                   | 13        | 0                   | 0         | 0                   | 0       | 0                   | 0       | 0                   | 0         | 0                   | 0         | 0                   | 0        |
| Eukaryota;Stramenopiles;Ochrophyta;Chrysophyceae;Chrysophyceae_X;__;__;<br>__;__                                                                | 120     | 113                 | 620     | 0                   | 1.3<br>09 | 98                  | 2.8<br>35 | 160                 | 139     | 83                  | 25      | 748                 | 1.5<br>47 | 0                   | 2.1<br>43 | 190                 | 1.625    |
| Eukaryota;Stramenopiles;Ochrophyta;Dictyochophyceae;Dictyochophyceae_X;P<br>edinellales;Pseudopedinella;Pseudopedinella_elastica;               | 70      | 12                  | 45      | 7                   | 660       | 0                   | 984       | 131                 | 6       | 0                   | 0       | 246                 | 832       | 0                   | 477       | 15                  | 209      |
| Eukaryota;Stramenopiles;Ochrophyta;Dictyochophyceae;Dictyochophyceae_X;P<br>edinellales;__;__                                                   | 0       | 0                   | 0       | 0                   | 5         | 0                   | 95        | 0                   | 0       | 0                   | 0       | 0                   | 42        | 0                   | 0         | 0                   | 0        |
| Eukaryota;Stramenopiles;Ochrophyta;Eustigmatophyceae;Eustigmatophyceae_<br>X;Eustigmatophyceae_XX;Monodus;Monodus_subterranea;                  | 0       | 0                   | 0       | 0                   | 0         | 0                   | 0         | 0                   | 16      | 0                   | 0       | 0                   | 0         | 0                   | 0         | 0                   | 0        |
| Eukaryota;Stramenopiles;Ochrophyta;Synurophyceae;Synurales;Synurales_X;M<br>allomonas;Mallomonas_akrokomos;                                     | 0       | 0                   | 0       | 0                   | 72        | 0                   | 0         | 0                   | 0       | 0                   | 0       | 0                   | 0         | 0                   | 0         | 0                   | 0        |
| Eukaryota;Stramenopiles;Ochrophyta;Synurophyceae;Synurales;Synurales_X;M<br>allomonas;Mallomonas_annulata;                                      | 20      | 0                   | 0       | 0                   | 27        | 0                   | 0         | 0                   | 0       | 0                   | 0       | 0                   | 0         | 0                   | 0         | 0                   | 0        |
| Eukaryota;Stramenopiles;Ochrophyta;Synurophyceae;Synurales;Synurales_X;M<br>allomonas;__;__                                                     | 26      | 22                  | 11      | 0                   | 249       | 0                   | 61        | 0                   | 0       | 0                   | 0       | 13                  | 190       | 0                   | 64        | 0                   | 0        |
| Eukaryota;Stramenopiles;Ochrophyta;Synurophyceae;Synurales;Synurales_X;Sy<br>nura;Synura_curtispina;                                            | 0       | 0                   | 0       | 0                   | 0         | 0                   | 0         | 0                   | 0       | 0                   | 0       | 0                   | 0         | 0                   | 0         | 0                   | 13       |
| Eukaryota;Stramenopiles;Ochrophyta;Synurophyceae;Synurales;Synurales_X;Sy<br>nurales_XX;Synurales_XX_sp.;                                       | 0       | 0                   | 0       | 17                  | 28        | 0                   | 50        | 118                 | 0       | 0                   | 0       | 0                   | 18        | 0                   | 16        | 0                   | 0        |
| Eukaryota;Stramenopiles;Ochrophyta;Synurophyceae;Synurales;Synurales_X;__<br>;__;__                                                             | 24      | 0                   | 17      | 0                   | 63        | 0                   | 87        | 0                   | 0       | 0                   | 0       | 27                  | 72        | 0                   | 36        | 0                   | 19       |
| Eukaryota;Stramenopiles;Ochrophyta;Xanthophyceae;Xanthophyceae_X;Xantho<br>phyceae_XX;Tribonema;__;__                                           | 0       | 0                   | 0       | 0                   | 10        | 0                   | 0         | 0                   | 0       | 0                   | 0       | 0                   | 0         | 0                   | 0         | 0                   | 0        |
| Eukaryota;Stramenopiles;Ochrophyta;__;__;__;__;__                                                                                               | 130     | 285                 | 249     | 67                  | 1.0<br>58 | 38                  | 5.5<br>02 | 254                 | 329     | 234                 | 71      | 797                 | 8.9<br>28 | 61                  | 1.6<br>06 | 203                 | 344      |
| Eukaryota;Stramenopiles;Opalozoa;Bicoecea;Bicoecales;Bicoecaceae;Bicoecaceae<br>_X;Bicoecaceae_X_sp.;                                           | 0       | 0                   | 0       | 0                   | 0         | 0                   | 0         | 0                   | 0       | 0                   | 0       | 0                   | 0         | 0                   | 413       | 53                  | 199      |
| Eukaryota;Stramenopiles;Opalozoa;Bicoecea;Bicoecales;Bicoecaceae;Bicosoeca;Bi<br>cosoeca_petiolata;                                             | 0       | 0                   | 0       | 0                   | 0         | 0                   | 0         | 0                   | 0       | 0                   | 0       | 0                   | 0         | 0                   | 0         | 0                   | 27       |
| Eukaryota;Stramenopiles;Opalozoa;Bicoecea;Pseudodendromonadales;Pseudod<br>endromonadales_X;Adriamonas;Adriamonas_peritocrescens;               | 0       | 0                   | 0       | 0                   | 0         | 0                   | 0         | 0                   | 0       | 0                   | 0       | 0                   | 5         | 0                   | 0         | 0                   | 0        |
| Eukaryota;Stramenopiles;Opalozoa;Bicoecea;Pseudodendromonadales;Pseudod                                                                         | 0       | 0                   | 0       | 0                   | 0         | 31                  | 0         | 0                   | 0       | 0                   | 0       | 0                   | 0         | 7                   | 0         | 0                   | 0        |

| Amplicon sequencing variants (ASVs)                                                                                                                                                             | V1<br>C | V1<br>NO<br>NE<br>U | V2<br>C | V2<br>NO<br>NE<br>U | V3<br>C | V3<br>NO<br>NE<br>U | V4<br>C | V4<br>NO<br>NE<br>U | V5<br>C | V5<br>NO<br>NE<br>U | V6<br>C | V6<br>NO<br>NE<br>U | V7<br>C | V7<br>NO<br>NE<br>U | V9<br>C | V9<br>NO<br>NE<br>U | V10<br>C |
|-------------------------------------------------------------------------------------------------------------------------------------------------------------------------------------------------|---------|---------------------|---------|---------------------|---------|---------------------|---------|---------------------|---------|---------------------|---------|---------------------|---------|---------------------|---------|---------------------|----------|
| endromonadales_X;Paramonas;Paramonas_globosa;<br>Eukaryota;Stramenopiles;Opalozoa;Bicoecia;Pseudodendromonadales;Pseudodendromonadales_X;Pseudodendromonadales_XX;Pseudodendromonadales_XX_sp.; | 93      | 31                  | 53      | 0                   | 768     | 6                   | 69      | 0                   | 23      | 0                   | 0       | 312                 | 848     | 0                   | 913     | 71                  | 22       |
| Eukaryota;Stramenopiles;Opalozoa;Bicoecia;__:_:_:_:_                                                                                                                                            | 0       | 0                   | 0       | 0                   | 10      | 26                  | 8       | 0                   | 0       | 0                   | 0       | 0                   | 5       | 0                   | 0       | 13                  | 0        |
